# Supplementary material
Source: bioRxiv or medRxiv preprint supplement (https://www.biorxiv.org/highwire/filestream/40522/field_highwire_adjunct_files/6/137695-6.pdf)

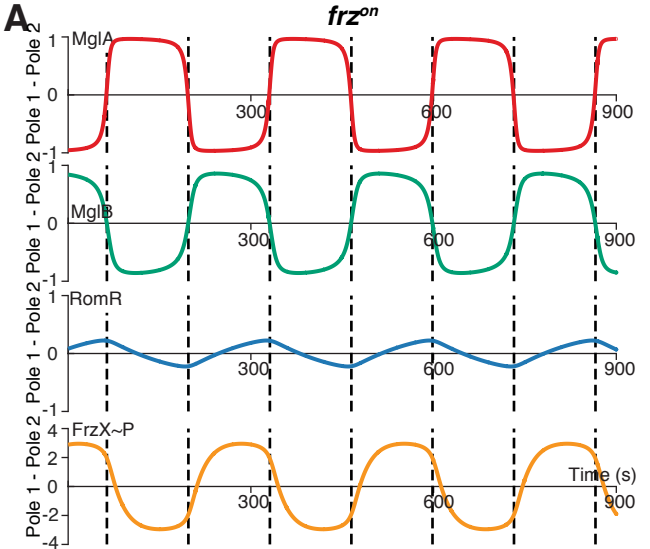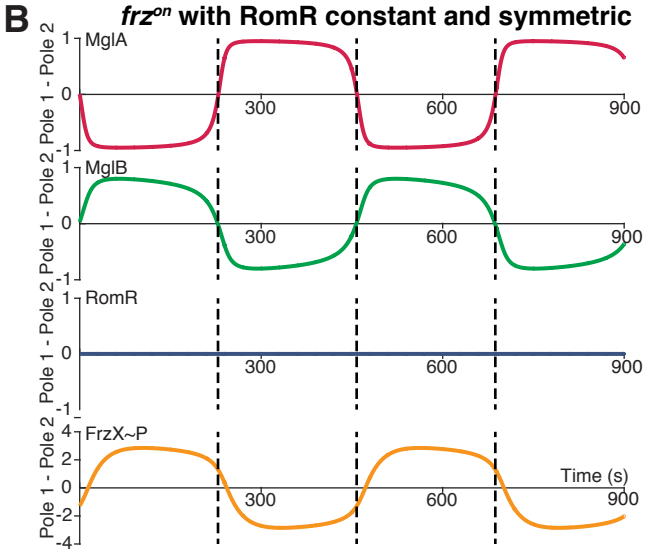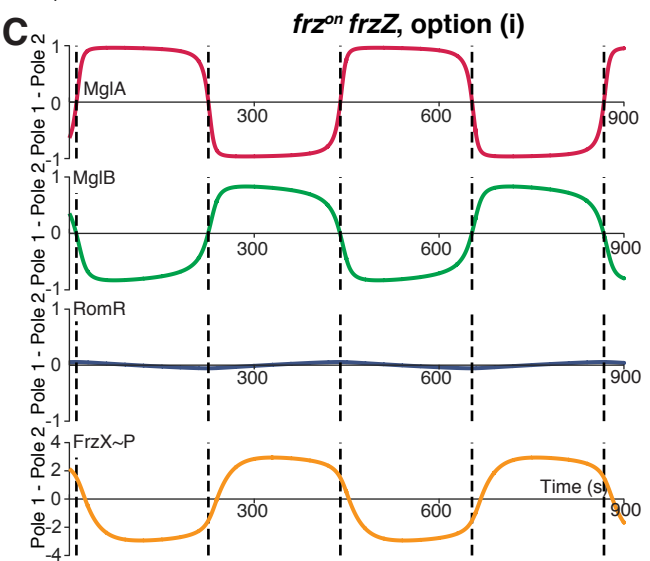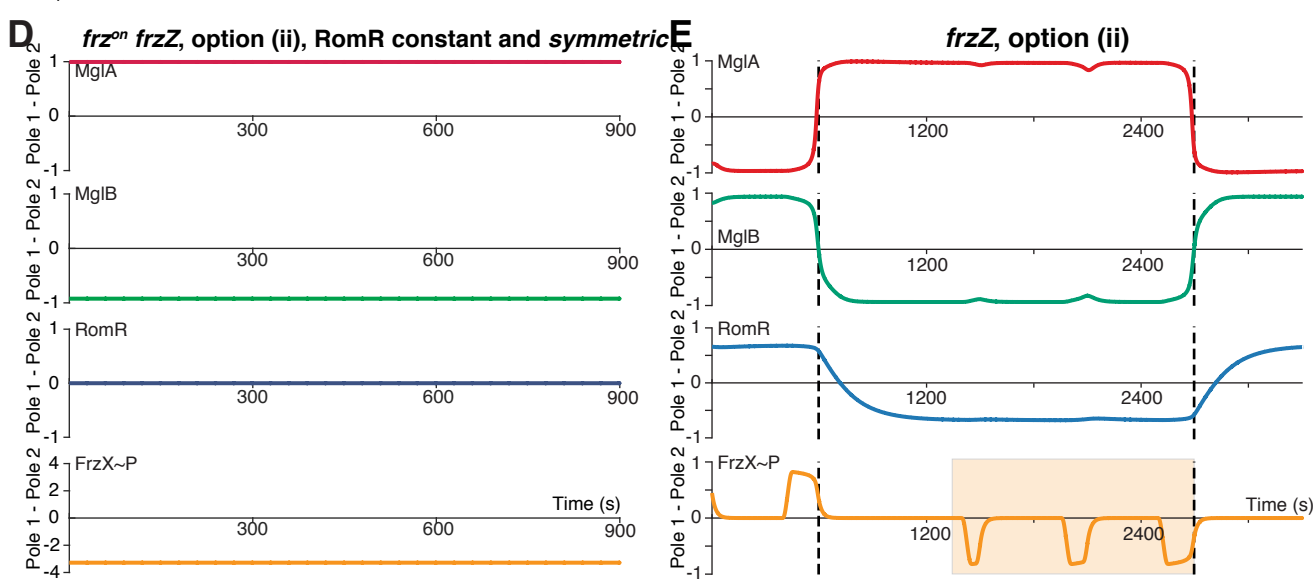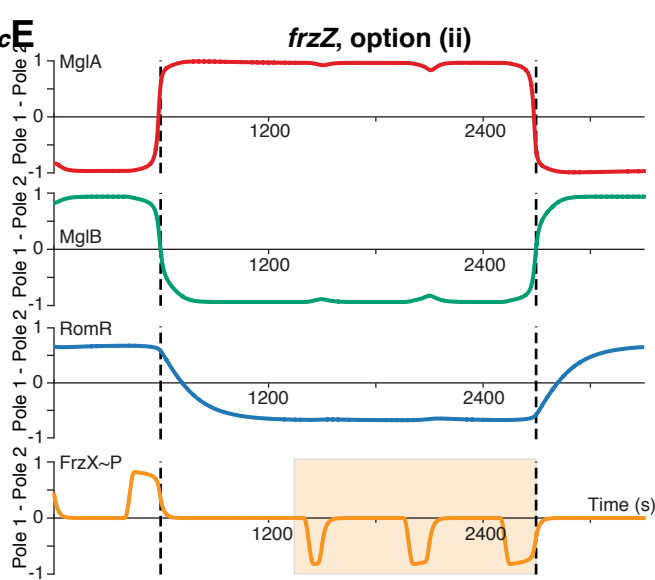

Supplement: Supplementary file [file 137695-6.pdf]
